# Supplementary material for: Sequence analysis of nonulosonic acid biosynthetic gene clusters in Vibrionaceae and Moritella viscosa
Source: PubMed Central journal article supplement (PMC7371886; doi:10.1038/s41598-020-68492-3), 2020-07-20
Supplement: 41598_2020_68492_MOESM1_ESM.pdf [file 41598_2020_68492_MOESM1_ESM.pdf]

# Supplementary Information

## Sequence analysis of nonulosonic acid biosynthetic gene clusters in *Vibrionaceae* and *Moritella viscosa*

Marie-Josée Haglund Halsør<sup>1</sup>, Bjørn Altermark<sup>1</sup>, and Inger Lin Uttakleiv Ræder<sup>1,\*</sup>

<sup>1</sup>The Norwegian Structural Biology Centre (NorStruct), Department of Chemistry, UiT- The Arctic University of Norway, N-9037 Tromsø, Norway

\*inger.l.rader@uit.no

**Table S1.** Sequences used for *Vibrio* sp. B9-25K2 phylogeny.

| Strain <i>reference</i>                         | Accession and ranges                              |                                 |                               |
|-------------------------------------------------|---------------------------------------------------|---------------------------------|-------------------------------|
|                                                 | 16SrDNA                                           | <i>ftsZ</i>                     | <i>gapA</i>                   |
| <i>Aliivibrio logei</i> MR17-77 <sup>1</sup>    | 1434910-1436398                                   | 3523605-3524840                 | 2928874-2929790               |
| <i>A. wodanis</i> 06/09/139 <sup>1</sup>        | LN554846.1 (506389-507875)                        | 464002-465231                   | 1057819-1058735               |
| <i>A. sp.</i> R8-63 <sup>1</sup>                | 2991032-2992518                                   | 80694-81932                     | 4041528-4042444               |
| <i>A. salmonicida</i> LFI1238 <sup>2</sup>      | NC_011312.1 (87128-88616)                         | 2857507-2856272                 | 1984565-1985481               |
| <i>Moritella viscosa</i> 06/09/139 <sup>3</sup> | LN554852.1 (31135-32623)                          | 4800155-4798974                 | 3844953-3845966               |
| <i>M. viscosa</i> LFI 5006 <sup>3</sup>         | FPLG <sup>a</sup> (81 <sup>b</sup> ; 98-1586)     | 88 <sup>b</sup> ; 80018-81199   | 53 <sup>b</sup> ; 23338-24351 |
| <i>Vibrio anguillarum</i> NB10 <sup>4,5</sup>   | LK021130.1 (233633-235121)                        | 2515501-2516718                 | 1112491-1113410               |
| <i>V. sp.</i> B9-25K2 <sup>1</sup>              | 3642484-3643981                                   | 242232-243211                   | 4201830-4202749               |
| <i>V. vulnificus</i> CMCP6 <sup>6,7</sup>       | AE016795.3 (475743-477229)                        | 588232-587018                   | 3210958-3211877               |
|                                                 | <i>gyrB</i>                                       | <i>mreB</i>                     | <i>pyrH</i>                   |
| <i>Aliivibrio logei</i> MR17-77 <sup>1</sup>    | 3216464-3217646                                   | 169476-170505                   | 3021801-3022387               |
| <i>A. wodanis</i> 06/09/139 <sup>1</sup>        | LN554846.1 (11401-12583)                          | 2635881-2634838                 | 2379026-2379612               |
| <i>A. sp.</i> R8-63 <sup>1</sup>                | 465716-466898                                     | 2026880-2027922                 | 1570486-1571072               |
| <i>A. salmonicida</i> LFI1238 <sup>2</sup>      | NC_011312.1 (11398-12580)                         | 541014-542057                   | 2595577-2596154               |
| <i>Moritella viscosa</i> 06/09/139 <sup>3</sup> | LN554852.1 (5072328-5073736)                      | 4853906-4854946                 | 4396130-4396716               |
| <i>M. viscosa</i> LFI 5006 <sup>3</sup>         | FPLG <sup>a</sup> (94 <sup>b</sup> ; 26583-27765) | 88 <sup>b</sup> ; 134953-135993 | 05 <sup>b</sup> ; 39318-39889 |
| <i>Vibrio anguillarum</i> NB10 <sup>4,5</sup>   | LK021130.1 (11313-12710)                          | 357047-358090                   | 2368060-2368788               |
| <i>V. sp.</i> B9-25K2 <sup>1</sup>              | 5040401-5041803                                   | 37279-38250                     | 3344816-3345402               |
| <i>V. vulnificus</i> CMCP6 <sup>6,7</sup>       | AE016795.3 (999953-1001349)                       | 1432966-1434009                 | 1856011-1856597               |
|                                                 | <i>recA</i>                                       | <i>rpoA</i>                     | <i>topA</i>                   |
| <i>Aliivibrio logei</i> MR17-77 <sup>1</sup>    | 4960-6003                                         | 3796758-3797685                 | 2769318-2771957               |
| <i>A. wodanis</i> 06/09/139 <sup>1</sup>        | LN554846.1 (616746-617792)                        | 2765320-2766247                 | 1218882-1221515               |
| <i>A. sp.</i> R8-63 <sup>1</sup>                | 1850404-1851453                                   | 2759195-2760122                 | 2965401-2968040               |
| <i>A. salmonicida</i> LFI1238 <sup>2</sup>      | NC_011312.1 (702343-703386)                       | 375824-376751                   | 1266401-1269040               |
| <i>Moritella viscosa</i> 06/09/139 <sup>3</sup> | LN554852.1 (529995-531035)                        | 4908357-4907374                 | 1552072-1554717               |
| <i>M. viscosa</i> LFI 5006 <sup>3</sup>         | FPLG <sup>a</sup> (05 <sup>b</sup> ; 60952-61992) | 90 <sup>b</sup> ; 852-1835      | 33 <sup>b</sup> ; 82187-84832 |
| <i>Vibrio anguillarum</i> NB10 <sup>4,5</sup>   | LK021130.1 (529112-529908)                        | 2696727-2697657                 | 1281671-1284301               |
| <i>V. sp.</i> B9-25K2 <sup>1</sup>              | 255724-256681                                     | 4035345-4036275                 | 4894973-4897596               |
| <i>V. vulnificus</i> CMCP6 <sup>6,7</sup>       | AE016795.3 (1563785-1564703)                      | 752353-753283                   | 2129301-2131925               |

<sup>a</sup> Whole Genome Sequencing (WGS) project identifier

<sup>b</sup> Contig number

|                              |                                                                                                                                                                            |     |
|------------------------------|----------------------------------------------------------------------------------------------------------------------------------------------------------------------------|-----|
| A. salmonicida LFI1238 (Neu) | .....MKKIYIVAEIGCNHNGDFNIAKMMVDEAKKAGVDAVKFQTFKADQLISKFAPKAEYQIKVGTGND                                                                                                     | 64  |
| M. viscosa 06/09/139 (Neu)   | MTNPVFEISGRKVLGDYAPLVIAEIGINHEGSLKTAFFEMVDAAIEGCAEIIKHQTH....VIEDEMSSBAKKVIPGNA                                                                                            | 74  |
| A. salmonicida LFI1238 (Leg) | .....MTLIIABAGVNHNGDENLAFQLVDAAYHAGADIVKFFQTFKAKNLVTEDAVQAEYQVNTNQKQ                                                                                                       | 62  |
| A. logei MR17-77             | .....MTLIIABAGVNHNGDENLAFQLVDAAYHAGADIVKFFQTFKAKNLVTEDAVQAEYQVNTNQKQ                                                                                                       | 62  |
| V. vulnificus CMCP6          | .....MNNQTFIIABAGVNHNGDIIVLAKKLIDAAANSQVDAVKFQTFWKTELLVTEDAKMAEYQIDNTQRE                                                                                                   | 65  |
| A. wodanis 06/09/139         | .....MKNQTFIIABAGVNHNGDIALAKKLIDVAANSQVDAVKFQTFWKTELLVTEDAKMAEYQIDNTQRE                                                                                                    | 65  |
| A. magni R8-63               | .....MTNKTFFIIABAGVNHNGDIRLAKQLIDAAADAGVDAVKFQTFWKTELLVTEDAKMAEYQVENTQRE                                                                                                   | 65  |
| M. viscosa 06/09/139 (Pse)   | MTEQYITIDGRKIGPNFSPYIIAELSANHNGDINRAFAIMEAAKACADAIKLQTYTQDT.ITMDCDSEFQIKGGLWH                                                                                              | 78  |
| Vibrio sp. B9-25K2           | .....MQIAGRKIGAGHKPYIIAEMSGNHNGDIKRAIELIKAAKEAGADAVKLTQTYTADT.ITIDHDGDEFLIKGGLWD                                                                                           | 73  |
|                              |                                                                                                                                                                            |     |
| A. salmonicida LFI1238 (Neu) | ESQ.LEMTRKLELPYDEFIKLEEYAKEIGLDVFSTPFDFSDIFL.ASREQTKTIPSGELLNLEYLEKIIARLPIAGKE                                                                                             | 141 |
| M. viscosa 06/09/139 (Neu)   | DVSIYEIMDRCSLNEEDEIKLKKYIESKGAIFISTPFSRAALRE.ERMVGSAYKICSGECNNYFLDLIASY...GKP                                                                                              | 149 |
| A. salmonicida LFI1238 (Leg) | ESQ.LAMLSRLELSYDIHHQLVKHCESLGIIEFLSTAFDSESLDFVNDLGLTRLKIPSGEITNAPLVLEHART...GCD                                                                                            | 137 |
| A. logei MR17-77             | ESQ.LAMLSRLELSYDVHQQLVKHCESLGIIEFLSTAFDSESLDFVNDLGLTRLKIPSGEITNAPLVLEHART...GCD                                                                                            | 137 |
| V. vulnificus CMCP6          | ESQ.FQMLKRLELSYDDFLELKEYCDSKNILFMSTPDEEQSATFL.NALQE.TFKICSGELTNTFLRHIASF...GKP                                                                                             | 138 |
| A. wodanis 06/09/139         | ESQ.FQMLKRLELSYDNFLELKEYCDSKNILFMSTPDEEQSATFL.NALQD.TFKICSGELTNTFLRHIASF...GKP                                                                                             | 138 |
| A. magni R8-63               | ETQ.FEMLKRLELSYDDFTELKSYCDDKGITFMSTPDEEQSATFL.DGLQA.VFKICSGELTNTFLRHIASF...AKP                                                                                             | 138 |
| M. viscosa 06/09/139 (Pse)   | GQSLYQLYTSAHMPWEWHQPLFAKAKELDITIFSSPFDFTAVDLE.EELDAPAYKIASFEIVDLPLIKRVAQT...GKP                                                                                            | 153 |
| Vibrio sp. B9-25K2           | GSRLYDLYQDAHTPWDPWHKVLDFDEAKKLGITIFSSPFDHTAVDLE.QALDAPAYKIASFELIDLPLIRKVAQT...GKP                                                                                          | 148 |
|                              |                                                                                                                                                                            |     |
| A. salmonicida LFI1238 (Neu) | IVI <del>STG</del> MATVEEIQ <del>LAL</del> .....DVLAKNGMKPEE.....ITILHCNTEYPTAFEDVNLNSIAGFK                                                                                | 196 |
| M. viscosa 06/09/139 (Neu)   | VII <del>STG</del> MNDIPSIRKSV.....EIFRKYKTP.....LCILH <del>TTNL</del> YPTDHLIRIGAMEEMQ                                                                                    | 201 |
| A. salmonicida LFI1238 (Leg) | LIV <del>STG</del> MATLSEIEAVLGVIAGFYVADKTEEPSLAFQQAAYASEQQKALKKKV <del>TILH</del> CTTEY <del>PAPM</del> VEINLKAM <del>DTLG</del>                                          | 216 |
| A. logei MR17-77             | LIV <del>STG</del> MATLSEIEAVLGVIAGFYVADKTEEPSLAFQQAAYASEQQKALKKQV <del>TILH</del> CTTEY <del>PAPM</del> AEINLKAM <del>DTLG</del>                                          | 216 |
| V. vulnificus CMCP6          | II <del>STG</del> MGYLSEVEHAL.....FTLKEAGIPTEL.....ITV <del>LH</del> ATTDYPTSPEDVNLQAM <del>LTIG</del>                                                                     | 193 |
| A. wodanis 06/09/139         | II <del>STG</del> MGYLSEVEHAL.....FTLKEAGIPTES.....ITV <del>LH</del> ATTDYPTSPEDVNLQAM <del>LTIG</del>                                                                     | 193 |
| A. magni R8-63               | VII <del>STG</del> MGYLSEVEHAV.....VTLRDAGLSLDM.....ITV <del>LH</del> ATTDYPTAPEDVNL <del>LAM</del> KDTIE                                                                  | 193 |
| M. viscosa 06/09/139 (Pse)   | MI <del>ISTG</del> MADQSEIEIAI.....QTA <del>KD</del> NGCDE.....LVV <del>LH</del> CVSGY <del>PAPAA</del> QYNLRTIADIG                                                        | 206 |
| Vibrio sp. B9-25K2           | II <del>ISTG</del> MGANLAEIEEAI.....LAAK <del>GAG</del> AKE.....LVL <del>LH</del> CTSGY <del>PTPAD</del> QANIST <del>M</del> SVMR                                          | 201 |
|                              |                                                                                                                                                                            |     |
| A. salmonicida LFI1238 (Neu) | ETIKQYKICFSDHSPGYFASIASVYPCITFIEKHF <del>TL</del> DKNFHG <del>PE</del> HKASVTP <del>EB</del> LTL <del>L</del> CQGI <del>RA</del> VEQALGSHDKLVTNS                           | 275 |
| M. viscosa 06/09/139 (Neu)   | REFSDVVVGLSDHSIDNLACLGAAAGASVLERHFTDNKARSQPDICCSMDGAECAELISQSKRMAQMRG.GSKGAVKE                                                                                             | 279 |
| A. salmonicida LFI1238 (Leg) | RAFE.LPAGYSDHSAGITIPIAAVARGAVLIEKHF <del>TL</del> DQNMEG <del>PE</del> HKASLEP <del>QL</del> TAMVSAIRQVEVALG <del>VGVK</del> SP <del>TVS</del>                             | 294 |
| A. logei MR17-77             | RAFE.LPAGYSDHSAGITIPIAAVARGAVLIEKHF <del>TL</del> DKNMEG <del>PE</del> HKASLEP <del>QL</del> TAMVSAIRQVEVALG <del>VGVK</del> SP <del>TVS</del>                             | 294 |
| V. vulnificus CMCP6          | YSFPGITICYS <del>DL</del> TLGIEIPVAAVAMCAK <del>VI</del> EKHF <del>TL</del> DNTMEG <del>PE</del> HKASLEP <del>EB</del> L <del>TAM</del> VQAIRNIELALGSGW <del>KV</del> PTAT | 272 |
| A. wodanis 06/09/139         | HSFPGITICYS <del>DL</del> TLGIEIPVAAVAMCAK <del>VI</del> EKHF <del>TL</del> DNTMEG <del>PE</del> HKASLEP <del>EB</del> L <del>TAM</del> VKAIRNIELALGSGW <del>KV</del> PTPT | 272 |
| A. magni R8-63               | QAFPGIIVGYS <del>DL</del> TLGTEIPVAAVAMCAK <del>VI</del> EKHF <del>TL</del> DKTMSG <del>PE</del> HKASLEP <del>QL</del> ADMVTAIRNIEQALGNGW <del>KV</del> PTKT               | 272 |
| M. viscosa 06/09/139 (Pse)   | QRFD.VLACLSDHTIDNATAVVSVAFGAC <del>VI</del> EKHF <del>TL</del> DRNAGCA <del>DS</del> FSLEP <del>DEL</del> ARLCRD <del>TY</del> TAWQAMCNVNYERTPA                            | 284 |
| Vibrio sp. B9-25K2           | GAFN.CEVGLSDHTMGIGVSI <del>AA</del> VALGAC <del>VI</del> EKHF <del>TL</del> ARADG <del>PE</del> S <del>AF</del> SLEKEBELKSLVDN <del>CAM</del> AFESLQPNFISTEA               | 279 |
|                              |                                                                                                                                                                            |     |
| A. salmonicida LFI1238 (Neu) | ERKNKIVARKSIVAKFDIKKGV <del>FT</del> LDNITTKR <del>PC</del> NG.ISPMSWYEV <del>L</del> GKTAEQD <del>F</del> SE <del>D</del> QLIAHSEFVAQEV                                   | 346 |
| M. viscosa 06/09/139 (Neu)   | EQVTIDFAYASVVTIKEIKAGEA <del>FT</del> KNLWV <del>KR</del> PC <del>TC</del> DFLAD <del>D</del> YEMLLGKKASQ <del>N</del> IDFVQLKKEFIK....                                    | 347 |
| A. salmonicida LFI1238 (Leg) | EVKNKAVARKSLVAAKAIQQCDLITEDNLTIKR <del>PC</del> SG.MSPYHYWALLNQPASQDYKAGDLIVE.....                                                                                         | 357 |
| A. logei MR17-77             | EVKNKAVARKSLVAAKAIQQGELITEDNLTIKR <del>PC</del> SG.MSPYHYW <del>TV</del> LNQPASQDYKAGDLIVE.....                                                                            | 357 |
| V. vulnificus CMCP6          | EKQNRNIVRKSIVAAQAIPEGTV <del>FT</del> KDMLS <del>IKR</del> PC <del>DC</del> .ISPTRWDEVIGSIAKKDYRDGELI.....                                                                 | 333 |
| A. wodanis 06/09/139         | EKQNRNIVRKSIVAAQTISEGTV <del>FT</del> KDMLS <del>IKR</del> PC <del>DC</del> .ISPTRWDEVIGSIAKKDYRDGELI.....                                                                 | 333 |
| A. magni R8-63               | EQENRNIVRKSIVAGKPI <del>M</del> AGSICAD <del>M</del> LEIKR <del>PC</del> NG.ISPTRWDEVVGSIAKKDYQIGELI.....                                                                  | 333 |
| M. viscosa 06/09/139 (Pse)   | EQGNVKF.RRSLYAVKDI <del>A</del> AGEL <del>L</del> TADN <del>V</del> RSI <del>R</del> PC <del>FG</del> .LEPKYYDQV <del>L</del> GKANV <del>I</del> ISKGTALSPGLIS....         | 350 |
| Vibrio sp. B9-25K2           | ESQTKPH.RRSLYIVKDI <del>A</del> KCEL <del>F</del> TDEH <del>V</del> RSI <del>R</del> PC <del>NG</del> .ILPKYLD <del>D</del> VIG <del>S</del> TATEDLTFGTPLKFGHFK....        | 345 |

**Figure S1.** Multiple alignment of unique NeuB sequences. The sequences from *A. salmonicida* LFI1238 (WP\_012551408.1 and WP\_012549051.1), *A. magni* R8-63 and *A. logei* MR17-77 were aligned with that of *M. viscosa* 06/09/139 (WP\_045111757.1 and WP\_045111735.1) and *A. wodanis* 06/09/139 (WP\_045100955.1) as well as *Vibrio* B9-25K2. The alignment was done using MUSCLE<sup>8,9</sup>.

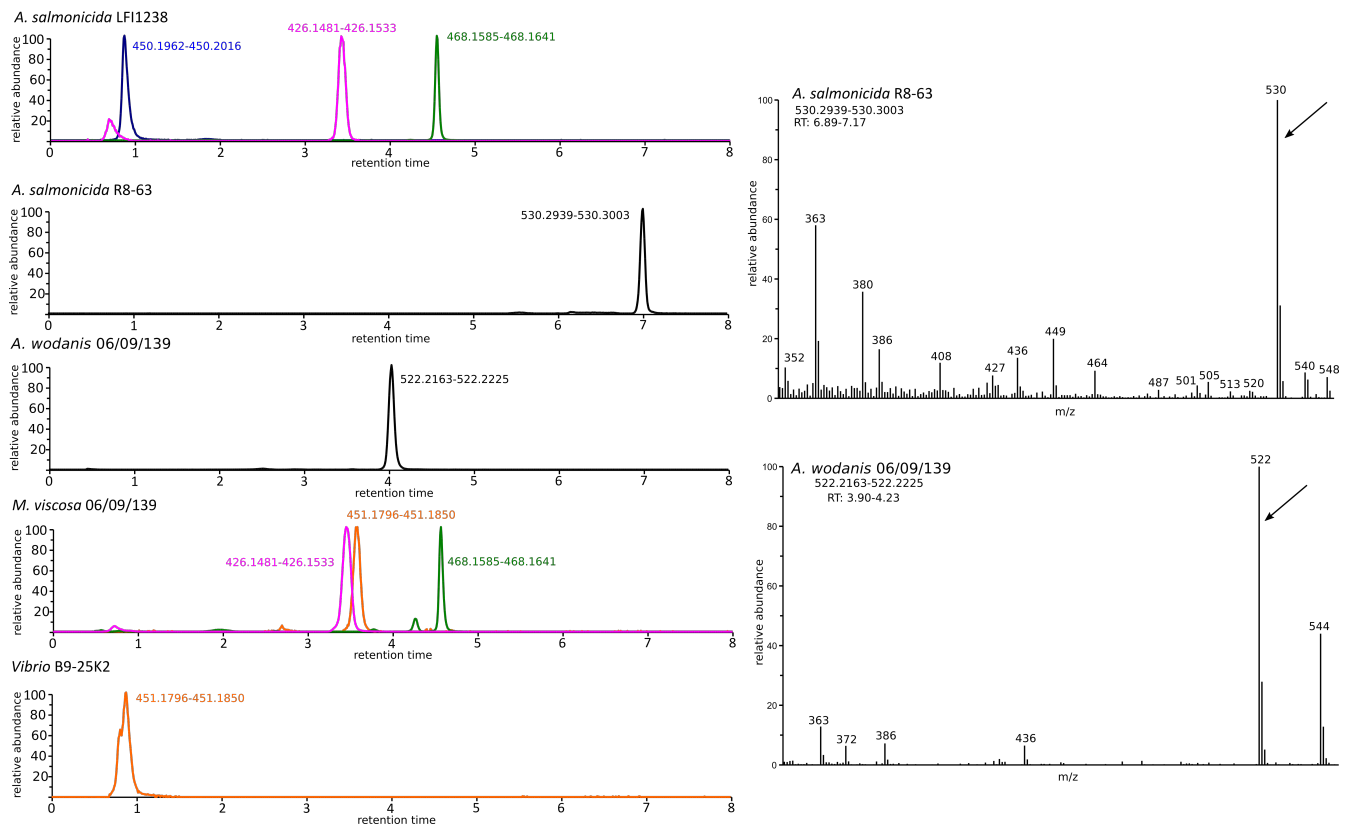

**Figure S2.** LC-MS analysis of bacterial NuO content derivatized with DMB. Left: FTMS+ pESI full MS spectra. The spectra are represented for each species as a function of relative abundance versus retention time (in minutes). When several mass ranges are considered, the spectra are combined in a single graph using different colors for each curve (blue, pink, green, and orange). The mass range ( $m/z$ ) corresponding to each peak is indicated next to it. Right: Mass spectra for the peaks from *A. salmonicida* R8-63 and *A. wodanis*.

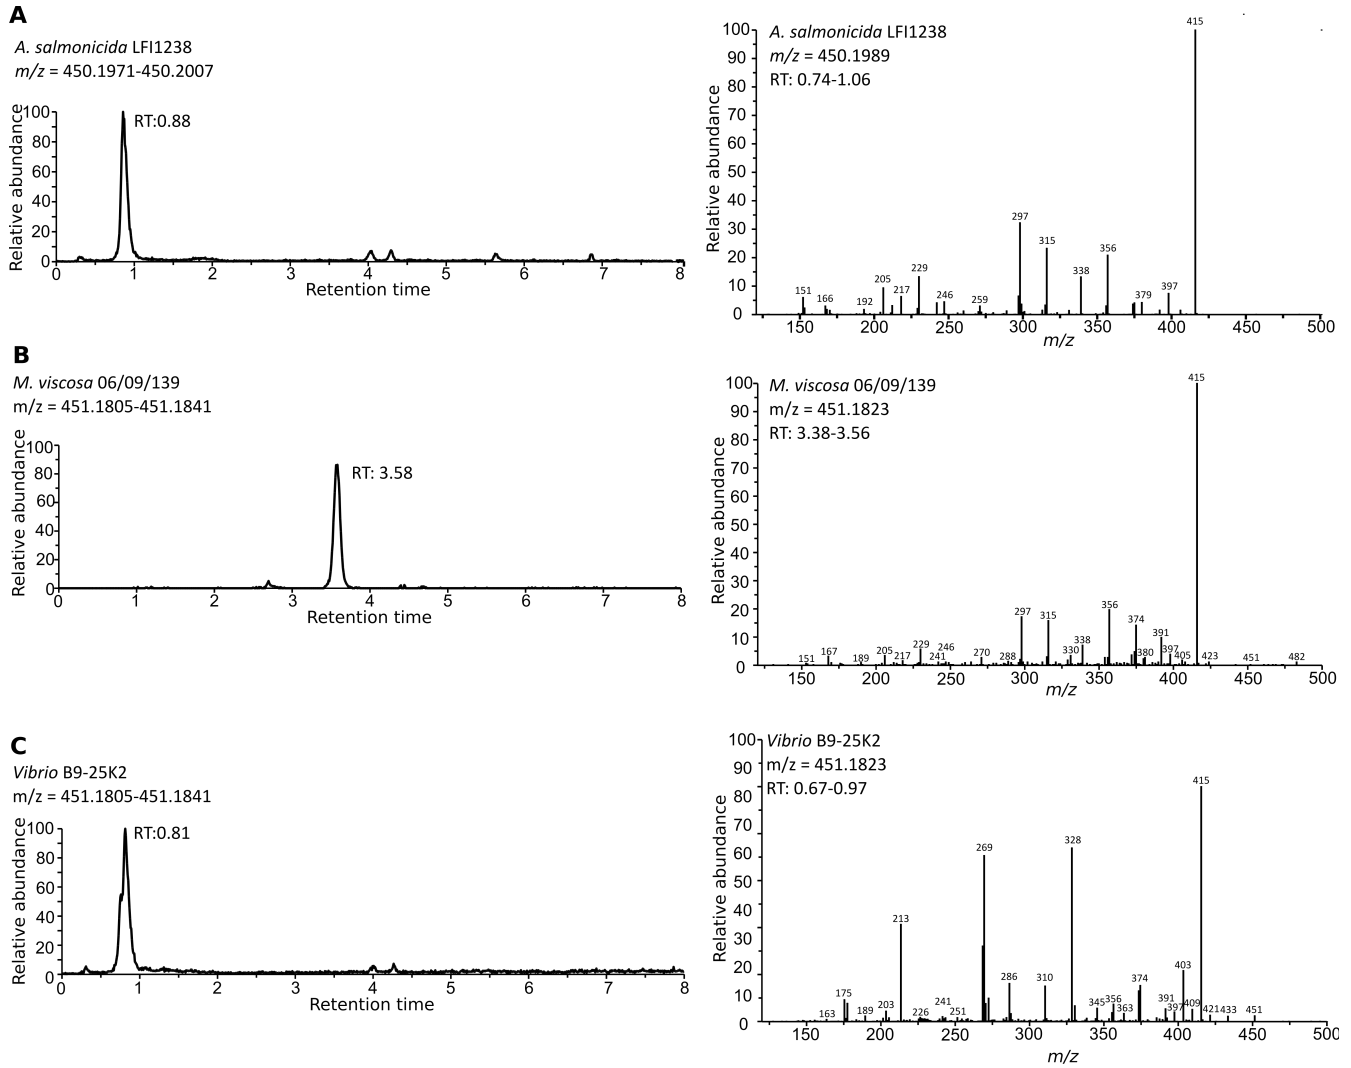

**Figure S3.** Mass spectrometry analysis of putative LegAcAm and PseAc2 compounds. A. Analysis for *A. salmonicida* LFI1238. Left: FTMS+ pESI full MS spectra at  $m/z = 450.1971 - 450.2007$ . Right: ITMS + cESI with full MS2 spectra of mass 450.1989 at time 0.74-1.06 minutes. B. Analysis for *M. viscosa* 06/09/139. Left: FTMS+ pESI full MS spectra at  $m/z = 451.1805 - 451.1841$ . Right: ITMS + cESI with full MS2 spectra of mass 451.1823 at time 3.38-3.56 minutes. C. Analysis for *Vibrio* B9-25K2. Left: FTMS+ pESI full MS spectra at  $m/z = 451.1805 - 451.1841$ . Right: ITMS + cESI with full MS2 spectra of mass 451.1823 at time 0.67-1.06 minutes.

## References

1. Purohit, A. A. *et al.* Presence of acyl-homoserine lactones in 57 members of the *Vibrionaceae* family. *J. Appl. Microbiol.* **115**, 835–847, DOI: <https://doi.org/10.1111/jam.12264> (2013).
2. Hjerde, E. *et al.* The genome sequence of the fish pathogen *Aliivibrio salmonicida* strain LFI1238 shows extensive evidence of gene decay. *BMC Genomics* **9**, DOI: <https://doi.org/10.1186/1471-2164-9-616> (2008).
3. Karlsen, C., Hjerde, E., Klemetsen, T. & Willassen, N. P. Pan genome and CRISPR analyses of the bacterial fish pathogen *Moritella viscosa*. *BMC genomics* **18**, 313, DOI: <https://doi.org/10.1186/s12864-017-3693-7> (2017).
4. Eiler, A. & Bertilsson, S. Detection and quantification of *Vibrio* populations using denaturant gradient gel electrophoresis. *J. Microbiol. Methods* **67**, 339–348, DOI: <https://doi.org/10.1016/j.mimet.2006.04.002> (2006).
5. Holm, K. O., Nilsson, K., Hjerde, E., Willassen, N. P. & Milton, D. L. Complete genome sequence of *Vibrio anguillarum* strain NB10, a virulent isolate from the Gulf of Bothnia. *Standards Genomic Sci.* **10**, DOI: <https://doi.org/10.1186/s40793-015-0060-7> (2015).
6. Kim, Y. R. *et al.* Characterization and Pathogenic Significance of *Vibrio vulnificus* Antigens Preferentially Expressed in Septicemic Patients. *Infect. Immun.* **71**, 5461–5471, DOI: [10.1128/IAI.71.10.5461-5471.2003](https://doi.org/10.1128/IAI.71.10.5461-5471.2003) (2003).
7. Kim, H. U. *et al.* Integrative genome-scale metabolic analysis of *Vibrio vulnificus* for drug targeting and discovery. *Mol. Syst. Biol.* **7**, 460, DOI: [10.1038/msb.2010.115](https://doi.org/10.1038/msb.2010.115) (2011).
8. Edgar, R. C. MUSCLE: Multiple sequence alignment with high accuracy and high throughput. *Nucleic Acids Res.* **32**, 1792–1797, DOI: <https://doi.org/10.1093/nar/gkh340> (2004).
9. Edgar, R. C. MUSCLE: A multiple sequence alignment method with reduced time and space complexity. *BMC Bioinforma.* **5**, DOI: <https://doi.org/10.1186/1471-2105-5-113> (2004).
